# Supplementary material
Source: publisher site journal article supplement (https://www.dovepress.com/article/479699)
Supplement: Supplementary file 1 [file get_supplementary_file.php]

**search strategy**

**Pubmed**

#1 ("gastric neoplas*"[Title/Abstract] OR "gastric cancer*"[Title/Abstract] OR "stomach neoplas*"[Title/Abstract] OR "stomach cancer*"[Title/Abstract] OR "stomach neoplasms"[MeSH Terms])

#2 ("risk assess*"[Title/Abstract] OR "risk screen*"[Title/Abstract] OR "risk scor*"[Title/Abstract] OR "risk identif*"[Title/Abstract] OR "risk detect*"[Title/Abstract] OR "risk predict*"[Title/Abstract] OR "early diagnos*"[Title/Abstract] OR "risk categor*"[Title/Abstract] OR "risk stratif*"[Title/Abstract])

#3 ("tool"[Title/Abstract] OR "rule"[Title/Abstract] OR "algorithm"[Title/Abstract] OR "score*"[Title/Abstract])

#4 #1 AND #2 AND #3

**Embase**

#1 'gastric neoplas*' OR 'gastric cancer*' OR 'stomach neoplas*' OR 'stomach cancer*' OR 'stomach neoplasms'/exp OR 'stomach neoplasms'

#2 'risk assess*' OR 'risk screen*' OR 'risk scor*' OR 'risk identif*' OR 'risk detect*' OR 'risk predict*' OR 'early diagnos*' OR 'risk categor*' OR 'risk stratif*'

#3 'tool' OR 'rule' OR 'algorithm' OR 'score*'

#4 #1 AND #2 AND #3 AND [article]/lim AND [english]/lim AND [embase]/lim

**Web of science**

#1 TS=("gastric neoplas*" OR "gastric cancer*" OR "stomach neoplas*" OR "stomach cancer*")

#2 TS=("risk assess*" OR "risk screen*" OR "risk scor*" OR "risk identif*" OR "risk detect*" OR "risk predict*" OR "early diagnos*" OR "risk categor*" OR "risk stratif*")

#3 TS=("tool" OR "rule" OR "algorithm" OR "score*")

#4 PY=(1980-2023)

#5 #1 AND #2 AND #3 AND #4

**CNKI**

#1 gastric cancer + stomach neoplasms

#2 risk prediction + risk assessment + risk factors

#3 model + tool

#4 #1 AND #2 AND #3

**WanFang Data**

#1 gastric cancer OR stomach neoplasms

#2 risk prediction OR risk assessment OR risk factors

#3 model OR tool

#4 #1 AND #2 AND #3

**VIP**

#1 gastric cancer OR stomach neoplasms

#2 risk prediction OR risk assessment OR risk factors

#3 model OR tool

#4 #1 AND #2 AND #3

**Table. Risk of bias and applicability of included studies for PROBAST Results***

| Study ID | ROB | | | |  | Applicability | | | |
| --- | --- | --- | --- | --- | --- | --- | --- | --- | --- |
| 1.Participants | 2.Predictors | 3.Outcome | 4.Analysis | Overall | 1.Participants | 2.Predictors | 3.Outcome | Overall |
| Wong 202382 | L | L | L | H | H | L | L | L | L |
| Zhang 202375 | L | L | L | H | H | H | L | L | L |
| Duan 202381 | H | L | L | H | H | L | L | L | L |
| Zhu 202379 | L | L | L | H | H | L | L | L | L |
| Afrash 202380 | H | L | L | H | H | L | L | H | H |
| Wang 202274 | H | H | L | H | H | L | H | L | H |
| Arai 202277 | L | L | L | H | H | L | L | L | L |
| Kawamura 202272 | L | L | L | H | H | H | L | H | L |
| Zhou 202159 | L | L | L | H | H | L | L | L | L |
| So 202171 | L | L | L | H | H | L | L | L | L |
| Park 202173 | H | L | L | H | H | H | H | H | H |
| Chakraborty 202170 | L | L | L | H | H | H | L | L | L |
| In H 202067 | H | L | H | H | H | H | H | H | H |
| Choi 202068 | L | H | L | H | H | L | H | L | L |
| Qiu 202069 | L | L | L | H | H | L | L | L | L |
| Charvat 202083 | NI | L | H | H | H | L | H | H | H |
| Tao 202065 | H | L | H | H | H | H | H | H | H |
| Cai 201964 | L | L | L | H | H | L | L | L | L |
| Taninaga 201966 | H | L | H | H | H | L | H | H | H |
| Iida 201852 | L | L | L | H | H | L | H | H | H |
| Wang 201885 | H | L | H | H | H | L | L | H | H |
| Tu 201776 | L | L | L | H | H | L | L | L | L |
| Ikeda 201662 | L | L | H | H | H | H | L | H | L |
| Charvat 201651 | NI | L | L | H | H | L | H | NI | H |
| Park 201663 | H | L | H | H | H | H | H | H | H |
| Lee 201560 | L | L | L | H | H | L | L | L | L |
| Eom 201561 | L | L | L | H | H | L | H | NI | L |
| Zhu 201484 | L | H | L | H | H | L | L | L | L |
| Lee 200978 | H | L | H | H | H | H | L | L | H |

PROBAST = Prediction model Risk Of Bias ASsessment Tool; ROB = risk of bias.

*****+ indicates low ROB/low concern regarding applicability; − indicates high ROB/high concern regarding applicability; and ? indicates unclear ROB/unclear concern regarding applicability.
